# Supplementary material
Source: HighWire-hosted journal article supplement (https://jnnp.bmj.com/content/94/5/337)
Supplement: inline-supplementary-material-2 [file inline-supplementary-material-2.pdf]

**Supplementary Table 2: Association of relapses to baclofen treatment among incident and prevalent MS individuals.**

| <b>Incident MS</b>         | <b>E</b> | <b>PT</b> | <b>M1<br/>HR</b> | <b>95% CI</b> | <b>M2<br/>HR</b> | <b>95% CI</b> | <b>M3<br/>HR</b> | <b>95% CI</b> | <b>M4<br/>HR</b> | <b>95% CI</b> | <b>M5<br/>HR</b> | <b>95% CI</b> |
|----------------------------|----------|-----------|------------------|---------------|------------------|---------------|------------------|---------------|------------------|---------------|------------------|---------------|
| <b>Relapses</b>            |          |           |                  |               |                  |               |                  |               |                  |               |                  |               |
| No relapses                | 7        | 609       | 1.00             |               | 1.00             |               | 1.00             |               | 1.00             |               | 1.00             |               |
| 1 relapse                  | 56       | 4396      | 0.94             | 0.43,2.07     | 1.22             | 0.46,3.22     | 2.13             | 0.21,21.10    | 1.10             | 0.41,2.94     | 1.12             | 0.42,2.99     |
| 2 relapses                 | 23       | 2054      | 0.98             | 0.41,2.31     | 1.35             | 0.49,3.74     | 2.52             | 0.25,24.87    | 1.09             | 0.38,3.10     | 1.10             | 0.39,3.15     |
| <b>Age at MS onset</b>     | 82       | 6669      |                  |               | 1.00             | 0.97,1.03     | 1.03             | 0.98,1.09     | 0.99             | 0.96,1.03     | 1.00             | 0.96,1.04     |
| <b>EDSS at study entry</b> |          |           |                  |               |                  |               |                  |               |                  |               |                  |               |
| EDSS 0-2.5                 | 22       | 2963      |                  |               |                  |               | 1.00             |               |                  |               |                  |               |
| EDSS 3-5.5                 | 12       | 617       |                  |               |                  |               | 2.11             | 0.99,4.49     |                  |               |                  |               |
| EDSS 6+                    | 1        | 35        |                  |               |                  |               | 1.98             | 0.21,18.59    |                  |               |                  |               |
| <b>DMT use</b>             |          |           |                  |               |                  |               |                  |               |                  |               |                  |               |
| No DMT                     | 3        | 659       |                  |               |                  |               |                  |               | 1.00             |               | 1.00             |               |
| Moderately effective DMT   | 63       | 5275      |                  |               |                  |               |                  |               | 2.70             | 0.83,8.79     | 2.77             | 0.82,9.33     |
| Highly effective DMT       | 8        | 493       |                  |               |                  |               |                  |               | 4.90             | 1.25,19.17    | 4.95             | 1.22,20.14    |

Individuals with incident MS diagnosed with RRMS with relapses (N=1146). Association of relapses at study entry to baclofen treatment. Model 1 adjusted for age, county of residence at MS diagnosis, and highest attained education. Model 2-5 additionally adjusted for number of years from MS onset to diagnosis and calendar year of MS diagnosis. Model 5 additionally adjusted for time with MS as an additional timescale. Disease modifying treatments are time-dependent variables. Note: varying number of individuals in each model due to missing values; Model 1 N=1146; Model 2 N=1077; Model 3 N=568; Model 4-5 N=908. Abbreviations: CI= confidence interval; DMT=disease modifying therapy; E=number of events; EDSS=Expanded Disability Severity Scale; HR=hazard ratio; M=model; PT=person-time. Reference category indicated by a hazard ratio of 1.00 with no confidence interval.

| <b>Prevalent MS</b>        | <b>E</b> | <b>PT</b> | <b>M1<br/>HR</b> | <b>95% CI</b> | <b>M2<br/>HR</b> | <b>95% CI</b> | <b>M3<br/>HR</b> | <b>95% CI</b> | <b>M4<br/>HR</b> | <b>95% CI</b> | <b>M5<br/>HR</b> | <b>95% CI</b> |
|----------------------------|----------|-----------|------------------|---------------|------------------|---------------|------------------|---------------|------------------|---------------|------------------|---------------|
| <b>Relapses</b>            |          |           |                  |               |                  |               |                  |               |                  |               |                  |               |
| No relapse                 | 11       | 516       | 1.00             |               | 1.00             |               | 1.00             |               | 1.00             |               | 1.00             |               |
| 1 relapse                  | 114      | 8053      | 0.75             | 0.40,1.41     | 0.77             | 0.41,1.44     | 1.25             | 0.30,5.23     | 0.88             | 0.44,1.75     | 0.90             | 0.45,1.79     |
| 2 relapses                 | 33       | 2578      | 0.70             | 0.35,1.40     | 0.71             | 0.36,1.42     | 1.20             | 0.28,5.15     | 0.81             | 0.38,1.71     | 0.82             | 0.39,1.74     |
| 3 relapses                 | 24       | 1552      | 0.83             | 0.40,1.72     | 0.85             | 0.41,1.76     | 1.03             | 0.23,4.63     | 0.88             | 0.40,1.93     | 0.89             | 0.40,1.96     |
| 4+ relapses                | 35       | 2445      | 0.79             | 0.40,1.58     | 0.80             | 0.40,1.58     | 1.44             | 0.34,6.13     | 0.90             | 0.43,1.91     | 0.92             | 0.43,1.94     |
| <b>Age at MS diagnosis</b> | 217      | 15144     |                  |               | 0.99             | 0.95,1.04     | 0.99             | 0.94,1.05     | 0.99             | 0.95,1.04     | 1.05             | 0.94,1.18     |
| <b>EDSS at study entry</b> |          |           |                  |               |                  |               |                  |               |                  |               |                  |               |
| EDSS 0-2.5                 | 84       | 7629      |                  |               |                  |               | 1.00             |               |                  |               |                  |               |
| EDSS 3-5.5                 | 43       | 2402      |                  |               |                  |               | 1.61             | 1.10,2.35     |                  |               |                  |               |
| EDSS 6+                    | 11       | 155       |                  |               |                  |               | 6.54             | 3.44,12.45    |                  |               |                  |               |
| <b>DMT use</b>             |          |           |                  |               |                  |               |                  |               |                  |               |                  |               |
| No DMT                     | 16       | 1852      |                  |               |                  |               |                  |               | 1.00             |               | 1.00             |               |
| Moderately effective DMT   | 183      | 11890     |                  |               |                  |               |                  |               | 1.86             | 1.08,3.22     | 1.85             | 1.07,3.21     |
| Highly effective DMT       | 5        | 240       |                  |               |                  |               |                  |               | 2.81             | 1.00,7.88     | 2.77             | 0.99,7.79     |

Individuals with prevalent MS diagnosed with RRMS with relapses (N=1890). Association of relapses at study entry to baclofen treatment. Model 1 adjusted for age, county of residence at MS diagnosis, and highest attained education. Model 2-5 additionally adjusted for number of years from MS onset to diagnosis and calendar year of MS diagnosis. Model 5 additionally adjusted for time with MS as an additional timescale. Disease modifying treatments are time-dependent variables. Note: varying number of individuals in each model due to missing values. Model 1,2 N=1890, Model 3 N=1268 Models 4-5 N=1745. Abbreviations: CI= confidence interval; DMT=disease modifying therapy; E=number of events; EDSS=Expanded Disability Severity Scale; HR=hazard ratio; M=model; PT=person-time. Reference category indicated by a hazard ratio of 1.00 with no confidence interval.
