# Supplementary material
Source: HighWire-hosted journal article supplement (https://jnnp.bmj.com/content/94/5/337)
Supplement: inline-supplementary-material-3 [file inline-supplementary-material-3.pdf]

**Supplementary Table 1: Baseline characteristics assessed at study entry of incident and prevalent individuals with MS, stratified by use of treatments for spasticity.**

| <b>Baseline characteristics</b>              | <b>Incident</b>          |                          | <b>Prevalent</b>         |                          |
|----------------------------------------------|--------------------------|--------------------------|--------------------------|--------------------------|
|                                              | <b>No Spasticity</b>     | <b>Spasticity</b>        | <b>No Spasticity</b>     | <b>Spasticity</b>        |
| <b>N</b>                                     | <b>1376</b>              | <b>450</b>               | <b>2347</b>              | <b>1172</b>              |
| <b>Type of treatment n(%)</b>                |                          |                          |                          |                          |
| Baclofen                                     |                          | 138(30.67)               |                          | 512(43.69)               |
| Clonazepam                                   |                          | 6(1.33)                  |                          | 39(3.33)                 |
| Diazepam                                     |                          | 78(17.33)                |                          | 231(19.71)               |
| Gabapentin                                   |                          | 226(50.22)               |                          | 388(33.11)               |
| Cannaboids                                   |                          | 2(0.44)                  |                          | 2(0.17)                  |
| <b>Sex n( %)</b>                             |                          |                          |                          |                          |
| Male                                         | 376(27.33)               | 133(29.56)               | 578(24.63)               | 324(27.65)               |
| Female                                       | 1000(72.67)              | 317(70.44)               | 1769(75.37)              | 848(72.35)               |
| <b>Highest attained education n( %)</b>      |                          |                          |                          |                          |
| Primary education                            | 98(7.12)                 | 55(12.22)                | 269(11.46)               | 193(16.47)               |
| Secondary education                          | 637(46.29)               | 227(50.44)               | 1087(46.31)              | 534(45.56)               |
| Tertiary education                           | 641(46.58)               | 168(37.33)               | 991(42.22)               | 445(37.97)               |
| <b>Comorbid diseases n( %)</b>               |                          |                          |                          |                          |
| Amyotrophic lateral sclerosis                | 0(0.00)                  | 0(0.00)                  | 0(0.00)                  | 1(0.09)                  |
| Depression                                   | 220(15.99)               | 114(25.33)               | 496(21.13)               | 384(32.76)               |
| Concussion or TBI                            | 2(0.15)                  | 1(0.22)                  | 4(0.17)                  | 4(0.34)                  |
| Coronary artery disease                      | 1(0.07)                  | 1(0.22)                  | 18(0.77)                 | 10(0.85)                 |
| Vascular disease                             | 13(0.94)                 | 9(2.00)                  | 68(2.90)                 | 44(3.75)                 |
| Stroke                                       | 12(0.87)                 | 4(0.89)                  | 38(1.62)                 | 21(1.79)                 |
| Parkinson's disease                          | 3(0.22)                  | 2(0.44)                  | 4(0.17)                  | 11(0.94)                 |
| Diabetes                                     |                          |                          |                          |                          |
| No diabetes                                  | 1364(99.13)              | 445(98.89)               | 2317(98.72)              | 1157(98.72)              |
| Type 1                                       | 2(0.15)                  | 4(0.89)                  | 10(0.43)                 | 6(0.51)                  |
| Type 2                                       | 9(0.65)                  | 1(0.22)                  | 18(0.77)                 | 8(0.68)                  |
| Type unknown                                 | 1(0.07)                  | 0(0.00)                  | 2(0.09)                  | 1(0.09)                  |
| Seizure                                      | 16(1.16)                 | 6(1.33)                  | 25(1.07)                 | 24(2.05)                 |
| Epilepsy                                     | 9(0.65)                  | 3(0.67)                  | 18(0.77)                 | 17(1.45)                 |
| <b>MS Characteristics n( %)</b>              |                          |                          |                          |                          |
| <b>Year of MS diagnosis</b>                  |                          |                          |                          |                          |
| 1945-1980                                    | 0(0.00)                  | 0(0.00)                  | 115(4.90)                | 47(4.01)                 |
| 1981-1990                                    | 0(0.00)                  | 0(0.00)                  | 241(10.27)               | 121(10.32)               |
| 1991-2000                                    | 0(0.00)                  | 0(0.00)                  | 886(37.75)               | 501(42.75)               |
| 2001-2005                                    | 117(8.50)                | 38(8.44)                 | 1105(47.08)              | 503(42.92)               |
| 2006-2007                                    | 433(31.47)               | 177(39.33)               | 0(0.00)                  | 0(0.00)                  |
| 2008-2009                                    | 357(25.94)               | 142(31.56)               | 0(0.00)                  | 0(0.00)                  |
| 2010-2011                                    | 329(23.91)               | 70(15.56)                | 0(0.00)                  | 0(0.00)                  |
| 2012-2014                                    | 140(10.17)               | 23(5.11)                 | 0(0.00)                  | 0(0.00)                  |
| <b>MS Disease course n( %)</b>               |                          |                          |                          |                          |
| Relapsing remitting                          | 1154(83.87)              | 312(69.33)               | 1545(65.83)              | 577(49.23)               |
| Primary progressive                          | 52(3.78)                 | 58(12.89)                | 138(5.88)                | 133(11.35)               |
| Secondary progressive                        | 67(4.87)                 | 54(12.00)                | 589(25.10)               | 432(36.86)               |
| Unknown                                      | 103(7.49)                | 26(5.78)                 | 75(3.20)                 | 30(2.56)                 |
| Mean age at MS diagnosis, years(SD, min-max) | 38.93(0.29, 18.06-64.82) | 42.44(0.49, 18.02-64.71) | 38.93(0.22, 18.04-64.88) | 40.47(0.31, 18.09-64.86) |
| Onset n (% missing)                          | 1229(10.68)              | 407(9.56)                | 2115(9.88)               | 1069(8.79)               |
| Mean age at MS onset, years(SD, min-max)     | 34.74(0.29, 8.75-63.59)  | 38.01(0.51, 10.37-62.67) | 32.54(0.21, 6.13-62.92)  | 33.65(0.31, 11.75-62.46) |
| <b>Number of relapses n( % missing)</b>      | <b>1007(26.82)</b>       | <b>323(28.22)</b>        | <b>1941(17.30)</b>       | <b>927(20.90)</b>        |
| 0 relapses                                   | 104(10.33)               | 29(8.98)                 | 62(3.19)                 | 30(3.24)                 |
| 1 relapse                                    | 624(61.97)               | 205(63.47)               | 1125(57.96)              | 574(61.92)               |

| <b>Baseline characteristics</b>  | <b>Incident</b>      |                   | <b>Prevalent</b>     |                   |
|----------------------------------|----------------------|-------------------|----------------------|-------------------|
|                                  | <b>No Spasticity</b> | <b>Spasticity</b> | <b>No Spasticity</b> | <b>Spasticity</b> |
| 2 relapses                       | 190(18.87)           | 54(16.72)         | 294(15.15)           | 121(13.05)        |
| 3 relapses                       | 55(5.46)             | 22(6.81)          | 182(9.38)            | 75(8.09)          |
| 4+ relapses                      | 34(3.38)             | 13(4.02)          | 278(14.32)           | 127(13.70)        |
| First DMT n (% missing)*         | 1239(9.96)           | 336(25.33)        | 2011(14.32)          | 917(21.76)        |
| No DMT use                       | 58(4.68)             | 29(8.63)          | 357(17.73)           | 158(17.21)        |
| Moderately effective DMT         | 1032(83.29)          | 267(79.46)        | 1595(79.20)          | 740(80.61)        |
| Highly effective DMT             | 149(12.03)           | 40(11.90)         | 62(3.08)             | 20(2.18)          |
| Median years to first DMT, (IQR) | 0.14(0.05-0.37)      | 0.11(0.05-0.29)   | 1.00(0.19-4.93)      | 1.05(0.14-4.75)   |
| EDSS n (% missing)               | 618(55.09)           | 196(56.44)        | 1473(37.24)          | 714(39.08)        |
| 0                                | 140(22.65)           | 15(7.65)          | 219(14.87)           | 42(5.88)          |
| 1-1.5                            | 203(32.85)           | 43(21.94)         | 329(22.34)           | 90(12.61)         |
| 2-2.5                            | 158(25.57)           | 67(34.18)         | 302(20.50)           | 129(18.07)        |
| 3-3.5                            | 81(13.11)            | 40(20.41)         | 239(16.23)           | 111(15.55)        |
| 4-4.5                            | 26(4.21)             | 13(6.63)          | 119(8.08)            | 68(9.52)          |
| 5-5.5                            | 5(0.81)              | 7(3.57)           | 77(5.23)             | 48(6.72)          |
| 6-6.5                            | 4(0.65)              | 10(5.10)          | 131(8.89)            | 169(23.67)        |
| 7-9.5                            | 1(0.16)              | 1(0.51)           | 57(3.87)             | 57(7.98)          |

**Abbreviations:** %=percentage; +=or more; DMT=disease modifying therapy; EDSS=expanded disability severity scale HR=hazard ratio; IQR=interquartile range; max=maximum; min=minimum; N=total number individuals ; n=total number in subgroup; Ref=reference group; SD=standard deviation; TBI=traumatic brain injury.

**Note:** For many of the MS characteristics, there were missing values in each of the variables of interest. The percentage missing are listed in the table for each given variable.

† Univariate Cox proportional hazard models were used to calculate hazard ratios using age as the underlying timescale. The hazard ratios can be interpreted as incidence rate ratios.

\* Given the status of disease modifying therapy (DMT) use can occur sometime after MS diagnosis, first DMT use was used as a time varying covariate (the value of the variable was allowed to change over time).
