# Supplementary material
Source: HighWire-hosted journal article supplement (https://jnnp.bmj.com/content/94/5/337)
Supplement: inline-supplementary-material-4 [file inline-supplementary-material-4.pdf]

**Supplementary Table 3: Individuals with incident MS and general variable associations with spasticity treatment.**

|                          | Event<br>s | PT   | M1   |           | M2   |           | M3   |           | M4*  |           | M5   |           | M6   |           |
|--------------------------|------------|------|------|-----------|------|-----------|------|-----------|------|-----------|------|-----------|------|-----------|
|                          |            |      | HR   | 95% CI    | HR   | 95% CI    | HR   | 95% CI    | HR   | 95% CI    | HR   | 95% CI    | HR   | 95% CI    |
| <b>Sex</b>               |            |      |      |           |      |           |      |           |      |           |      |           |      |           |
| Male                     | 132        | 2518 | 1.00 |           | 1.00 |           | 1.00 |           | 1.00 |           | 1.00 |           | 1.00 |           |
| Female                   | 316        | 6701 | 0.93 | 0.76,1.14 | 0.97 | 0.79,1.19 | 1.07 | 0.87,1.32 | 1.03 | 0.83,1.28 | 1.08 | 0.87,1.32 | 1.08 | 0.88,1.33 |
| <b>Education</b>         |            |      |      |           |      |           |      |           |      |           |      |           |      |           |
| Compulsory               | 55         | 697  |      |           | 1.00 |           | 1.00 |           | 1.00 |           | 1.00 |           | 1.00 |           |
| Post-compulsory          | 226        | 4421 |      |           | 0.66 | 0.49,0.89 | 0.70 | 0.52,0.94 | 0.65 | 0.48,0.89 | 0.73 | 0.54,0.99 | 0.72 | 0.53,0.98 |
| Tertiary                 | 167        | 4101 |      |           | 0.52 | 0.38,0.71 | 0.56 | 0.41,0.76 | 0.57 | 0.41,0.79 | 0.59 | 0.43,0.81 | 0.57 | 0.42,0.79 |
| <b>Disease course †</b>  |            |      |      |           |      |           |      |           |      |           |      |           |      |           |
| RRMS                     | 298        | 7358 |      |           |      |           | 1.00 |           | 1.00 |           | 1.00 |           | 1.00 |           |
| PPMS                     | 57         | 417  |      |           |      |           | 3.18 | 2.34,4.34 | 2.85 | 2.06,3.95 | 2.75 | 2.02,3.75 | 3.09 | 2.27,4.22 |
| SPMS                     | 67         | 750  |      |           |      |           | 2.22 | 1.67,2.95 | 2.70 | 2.00,3.63 | 2.21 | 1.66,2.94 | 2.26 | 1.70,3.01 |
| Unknown                  | 26         | 694  |      |           |      |           | 0.89 | 0.59,1.33 | 0.80 | 0.48,1.36 | 0.89 | 0.60,1.33 | 0.88 | 0.59,1.32 |
| <b>Age at MS onset</b>   | 405        | 8325 |      |           |      |           |      |           | 1.04 | 1.02,1.06 |      |           |      |           |
| <b>Years with MS †</b>   |            |      |      |           |      |           |      |           |      |           |      |           |      |           |
| <0.5                     | 108        | 768  |      |           |      |           |      |           |      |           | 1.00 |           |      |           |
| ≥0.5 to <1               | 46         | 806  |      |           |      |           |      |           |      |           | 0.40 | 0.28,0.57 |      |           |
| ≥1 to <2                 | 82         | 1613 |      |           |      |           |      |           |      |           | 0.35 | 0.26,0.47 |      |           |
| ≥2 to <3                 | 62         | 1471 |      |           |      |           |      |           |      |           | 0.30 | 0.22,0.40 |      |           |
| ≥3 to <6                 | 112        | 3206 |      |           |      |           |      |           |      |           | 0.24 | 0.18,0.31 |      |           |
| ≥6                       | 38         | 1356 |      |           |      |           |      |           |      |           | 0.18 | 0.13,0.27 |      |           |
| <b>MS diagnosis year</b> |            |      |      |           |      |           |      |           |      |           |      |           |      |           |
| 2005                     | 38         | 1130 |      |           |      |           |      |           |      |           |      |           | 1.00 |           |
| 2006-2007                | 177        | 3921 |      |           |      |           |      |           |      |           |      |           | 1.30 | 0.92,1.85 |
| 2008-2009                | 141        | 2402 |      |           |      |           |      |           |      |           |      |           | 1.76 | 1.23,2.53 |
| 2010-2011                | 70         | 1420 |      |           |      |           |      |           |      |           |      |           | 1.51 | 1.01,2.25 |
| 2012-2014                | 22         | 346  |      |           |      |           |      |           |      |           |      |           | 1.99 | 1.17,3.38 |

**Abbreviations:** CI=confidence interval; HR=hazard ratio; M=model; RRMS=relapsing remitting MS; PT=person-time; PPMS=primary progressive MS; SPMS; secondary progressive MS.

Individuals with incident MS (N=1822) additionally excluding individuals with PPMS/SPMS diagnosed ≤ 25 year of age (n=4). All models are adjusted for age and county of residence at MS diagnosis. Variable categories with hazard ratios of 1.00 without confidence intervals are reference categories.

\* Due to unknown MS onset dates, model 4 includes 1632/1822 individuals.

† Time varying covariates.

**Supplementary Table 4: Individuals with prevalent MS and their risk of spasticity treatment for general predictors.**

|                            | Events | PT    | M1   |           | M2   |           | M3   |           | M4   |           | M5*  |           | M6   |           | M7   |           |
|----------------------------|--------|-------|------|-----------|------|-----------|------|-----------|------|-----------|------|-----------|------|-----------|------|-----------|
|                            |        |       | HR   | 95% CI    | HR   | 95% CI    | HR   | 95% CI    | HR   | 95% CI    | HR   | 95% CI    | HR   | 95% CI    | HR   | 95% CI    |
| <b>Sex</b>                 |        |       |      |           |      |           |      |           |      |           |      |           |      |           |      |           |
| Male                       | 324    | 6015  | 1.00 |           | 1.00 |           | 1.00 |           | 1.00 |           | 1.00 |           | 1.00 |           | 1.00 |           |
| Female                     | 844    | 17875 | 0.88 | 0.77,1.00 | 0.89 | 0.78,1.01 | 0.95 | 0.83,1.08 | 0.96 | 0.84,1.09 | 0.96 | 0.84,1.10 | 0.96 | 0.84,1.09 | 0.94 | 0.83,1.07 |
| <b>Education</b>           |        |       |      |           |      |           |      |           |      |           |      |           |      |           |      |           |
| Compulsory                 | 192    | 2908  |      |           | 1.00 |           | 1.00 |           | 1.00 |           | 1.00 |           | 1.00 |           | 1.00 |           |
| Post-compulsory            | 532    | 11036 |      |           | 0.75 | 0.63,0.89 | 0.78 | 0.66,0.92 | 0.78 | 0.66,0.92 | 0.74 | 0.62,0.88 | 0.78 | 0.66,0.92 | 0.77 | 0.65,0.92 |
| Tertiary                   | 444    | 9946  |      |           | 0.71 | 0.60,0.85 | 0.76 | 0.63,0.90 | 0.76 | 0.64,0.90 | 0.72 | 0.61,0.87 | 0.76 | 0.64,0.90 | 0.75 | 0.63,0.90 |
| <b>Disease course †</b>    |        |       |      |           |      |           |      |           |      |           |      |           |      |           |      |           |
| RRMS                       | 489    | 14255 |      |           |      |           | 1.00 |           | 1.00 |           | 1.00 |           | 1.00 |           | 1.00 |           |
| PPMS                       | 130    | 1543  |      |           |      |           | 2.77 | 2.25,3.41 | 2.70 | 2.19,3.33 | 2.68 | 2.15,3.33 | 2.73 | 2.21,3.36 | 2.72 | 2.21,3.35 |
| SPMS                       | 519    | 7360  |      |           |      |           | 2.23 | 1.95,2.56 | 2.31 | 2.01,2.66 | 2.32 | 2.01,2.69 | 2.29 | 1.99,2.62 | 2.24 | 1.95,2.58 |
| Unknown                    | 30     | 732   |      |           |      |           | 1.28 | 0.88,1.85 | 1.23 | 0.84,1.78 | 0.93 | 0.52,1.66 | 1.24 | 0.85,1.79 | 1.26 | 0.87,1.83 |
| <b>Age at MS diagnosis</b> | 1168   | 23890 |      |           |      |           |      |           | 1.02 | 1.01,1.03 |      |           |      |           |      |           |
| <b>Age at MS onset</b>     | 1065   | 21573 |      |           |      |           |      |           |      |           | 1.01 | 1.00,1.02 |      |           |      |           |
| <b>Years with MS †</b>     |        |       |      |           |      |           |      |           |      |           |      |           |      |           |      |           |
| 1 to <1.5                  | 2      | 43    |      |           |      |           |      |           |      |           |      |           | 1.00 |           |      |           |
| >=1.5 to <2                | 9      | 119   |      |           |      |           |      |           |      |           |      |           | 1.57 | 0.34,7.32 |      |           |
| >=2 to <2.5                | 14     | 187   |      |           |      |           |      |           |      |           |      |           | 1.54 | 0.35,6.82 |      |           |
| >=2 to <3                  | 15     | 256   |      |           |      |           |      |           |      |           |      |           | 1.19 | 0.27,5.20 |      |           |
| >=3 to <3.5                | 18     | 316   |      |           |      |           |      |           |      |           |      |           | 1.13 | 0.26,4.88 |      |           |
| >=3.5 to 4                 | 20     | 388   |      |           |      |           |      |           |      |           |      |           | 0.98 | 0.23,4.21 |      |           |
| >=4 to <6                  | 113    | 2414  |      |           |      |           |      |           |      |           |      |           | 0.89 | 0.22,3.61 |      |           |
| >=6 to <8                  | 168    | 3339  |      |           |      |           |      |           |      |           |      |           | 0.92 | 0.23,3.74 |      |           |
| >=8 to <10                 | 173    | 3759  |      |           |      |           |      |           |      |           |      |           | 0.83 | 0.20,3.35 |      |           |
| >=10                       | 636    | 13069 |      |           |      |           |      |           |      |           |      |           | 0.79 | 0.20,3.18 |      |           |
| <b>MS diagnosis year</b>   |        |       |      |           |      |           |      |           |      |           |      |           |      |           |      |           |
| 1945-1980                  | 47     | 1092  |      |           |      |           |      |           |      |           |      |           |      |           | 0.81 | 0.59,1.12 |
| 1981-1990                  | 121    | 2409  |      |           |      |           |      |           |      |           |      |           |      |           | 0.89 | 0.72,1.10 |
| 1991-2000                  | 501    | 9209  |      |           |      |           |      |           |      |           |      |           |      |           | 1.08 | 0.95,1.23 |
| 2001-2005                  | 499    | 11179 |      |           |      |           |      |           |      |           |      |           |      |           | 1.00 |           |

**Abbreviations:** CI=confidence interval; HR=hazard ratio; M=model; RRMS=relapsing remitting MS; PT=person-time; PPMS=primary progressive MS; SPMS; secondary progressive MS.

Individuals with prevalent MS (N=3514) additionally excluding individuals with PPMS/SPMS under age 25 at study entry (n=5). All models adjusted for age and county of residence at MS diagnosis. Disease course and years with MS are time-varying covariates. Reference categories indicated by hazard ratios of 1.00 with no confidence interval.

\* Due to unknown MS onset dates, model 5 includes 3179/3514 individuals.

† Time varying covariates.

**Supplementary Table 5: Sensitivity analysis among incident MS individuals with no diagnosis of depression or prescription for antidepressants. General variables and their association with spasticity treatment.**

|                          | Events | PT   | M1   |           | M2   |           | M3   |           | M4 * |           | M5   |           | M6   |                |
|--------------------------|--------|------|------|-----------|------|-----------|------|-----------|------|-----------|------|-----------|------|----------------|
|                          |        |      | HR   | 95% CI    | HR   | 95% CI    | HR   | 95% CI    | HR   | 95% CI    | HR   | 95% CI    | HR   | 95% CI         |
| <b>Sex</b>               |        |      |      |           |      |           |      |           |      |           |      |           |      |                |
| Male                     | 78     | 1725 | 1.00 |           | 1.00 |           | 1.00 |           | 1.00 |           | 1.00 |           | 1.00 |                |
| Female                   | 169    | 3815 | 1.00 | 0.76,1.32 | 1.06 | 0.80,1.39 | 1.17 | 0.88,1.55 | 1.14 | 0.84,1.54 | 1.22 | 0.92,1.63 | 1.21 | 0.91,1.61      |
| <b>Education</b>         |        |      |      |           |      |           |      |           |      |           |      |           |      |                |
| Compulsory               | 27     | 334  |      |           | 1.00 |           | 1.00 |           | 1.00 |           | 1.00 |           | 1.00 |                |
| Post-compulsory          | 120    | 2612 |      |           | 0.59 | 0.38,0.92 | 0.71 | 0.45,1.11 | 0.68 | 0.42,1.09 | 0.73 | 0.46,1.16 | 0.71 | 0.45,1.13      |
| Tertiary                 | 100    | 2594 |      |           | 0.49 | 0.31,0.77 | 0.57 | 0.36,0.91 | 0.61 | 0.38,1.00 | 0.60 | 0.38,0.97 | 0.57 | 0.36,0.90      |
| <b>Disease course †</b>  |        |      |      |           |      |           |      |           |      |           |      |           |      |                |
| RRMS                     | 165    | 4637 |      |           |      |           | 1.00 |           | 1.00 |           | 1.00 |           | 1.00 |                |
| PPMS                     | 33     | 200  |      |           |      |           | 5.06 | 3.27,7.82 | 4.73 | 3.01,7.43 | 3.92 | 2.51,6.12 | 4.84 | 3.13,7.48      |
| SPMS                     | 37     | 363  |      |           |      |           | 2.86 | 1.92,4.25 | 3.66 | 2.39,5.59 | 2.85 | 1.90,4.27 | 2.75 | 1.84,4.10      |
| Unknown                  | 12     | 340  |      |           |      |           | 1.08 | 0.59,1.96 | 0.83 | 0.36,1.89 | 1.05 | 0.58,1.93 | 1.07 | 0.59,1.95      |
| <b>Age at MS onset</b>   | 223    | 5073 |      |           |      |           |      |           | 1.06 | 1.03,1.09 |      |           |      |                |
| <b>Years with MS †</b>   |        |      |      |           |      |           |      |           |      |           |      |           |      |                |
| <0.5                     | 76     | 475  |      |           |      |           |      |           |      |           | 1.00 |           |      |                |
| >=0.5 to <1              | 29     | 494  |      |           |      |           |      |           |      |           | 0.42 | 0.27,0.65 |      |                |
| >=1 to <2                | 43     | 983  |      |           |      |           |      |           |      |           | 0.28 | 0.19,0.42 |      |                |
| >=2 to <3                | 32     | 893  |      |           |      |           |      |           |      |           | 0.23 | 0.15,0.35 |      |                |
| >=3 to <6                | 54     | 1912 |      |           |      |           |      |           |      |           | 0.17 | 0.12,0.25 |      |                |
| >=6                      | 13     | 782  |      |           |      |           |      |           |      |           | 0.09 | 0.05,0.18 |      |                |
| <b>MS diagnosis year</b> |        |      |      |           |      |           |      |           |      |           |      |           |      |                |
| 2005                     | 18     | 624  |      |           |      |           |      |           |      |           |      |           |      | 1.00           |
| 2006-2007                | 95     | 2229 |      |           |      |           |      |           |      |           |      |           |      | 1.41 0.84,2.37 |
| 2008-2009                | 81     | 1521 |      |           |      |           |      |           |      |           |      |           |      | 1.87 1.10,3.18 |
| 2010-2011                | 40     | 920  |      |           |      |           |      |           |      |           |      |           |      | 1.54 0.87,2.73 |
| 2012-2014                | 13     | 244  |      |           |      |           |      |           |      |           |      |           |      | 1.94 0.93,4.05 |

**Abbreviations:** CI=confidence interval; HR=hazard ratio; M=model; RRMS=relapsing remitting MS; PT=person-time; PPMS=primary progressive MS; SPMS; secondary progressive MS.

Individuals with incident MS (N=1123) excluding individuals (n=703) ever diagnosed with depression or prescribed an anti-depressant and PPMS/SPMS diagnosed < age 25 year (n=2). All models adjusted for age and county of residence at MS diagnosis. In models where region of residence violated proportional hazards assumption, a stratified Cox model was used. Variable categories with hazard ratios of 1.00 without confidence intervals are reference categories.

\* Due to missing data, model including MS onset includes N=1011.

† Time varying covariates.

**Supplementary Table 6: Sensitivity analysis among incident MS individuals excluding individuals with a history of seizures for general variable associations with spasticity treatment.**

|                          | Events | PT   | M1   |           | M2   |           | M3   |           | M4*  |           | M5   |           | M6   |                |
|--------------------------|--------|------|------|-----------|------|-----------|------|-----------|------|-----------|------|-----------|------|----------------|
|                          |        |      | HR   | 95% CI    | HR   | 95% CI    | HR   | 95% CI    | HR   | 95% CI    | HR   | 95% CI    | HR   | 95% CI         |
| <b>Sex</b>               |        |      |      |           |      |           |      |           |      |           |      |           |      |                |
| Male                     | 131    | 2462 | 1.00 |           | 1.00 |           | 1.00 |           | 1.00 |           | 1.00 |           | 1.00 |                |
| Female                   | 308    | 6586 | 0.91 | 0.74,1.12 | 0.95 | 0.77,1.18 | 1.04 | 0.84,1.28 | 0.98 | 0.79,1.22 | 1.06 | 0.86,1.31 | 1.05 | 0.85,1.30      |
| <b>Education</b>         |        |      |      |           |      |           |      |           |      |           |      |           |      |                |
| Compulsory               | 55     | 673  |      |           | 1.00 |           | 1.00 |           | 1.00 |           | 1.00 |           | 1.00 |                |
| Post-compulsory          | 219    | 4323 |      |           | 0.62 | 0.45,0.84 | 0.64 | 0.47,0.87 | 0.61 | 0.45,0.85 | 0.68 | 0.50,0.93 | 0.66 | 0.49,0.90      |
| Tertiary                 | 165    | 4051 |      |           | 0.50 | 0.36,0.69 | 0.53 | 0.38,0.73 | 0.56 | 0.40,0.78 | 0.56 | 0.41,0.77 | 0.54 | 0.39,0.75      |
| <b>Disease course †</b>  |        |      |      |           |      |           |      |           |      |           |      |           |      |                |
| RRMS                     | 291    | 7231 |      |           |      |           | 1.00 |           | 1.00 |           | 1.00 |           | 1.00 |                |
| PPMS                     | 56     | 413  |      |           |      |           | 3.24 | 2.36,4.45 | 2.98 | 2.13,4.16 | 2.71 | 1.97,3.74 | 3.13 | 2.28,4.30      |
| SPMS                     | 66     | 729  |      |           |      |           | 2.30 | 1.72,3.07 | 2.71 | 2.00,3.68 | 2.28 | 1.70,3.05 | 2.36 | 1.76,3.15      |
| Unknown                  | 26     | 674  |      |           |      |           | 0.97 | 0.64,1.45 | 0.90 | 0.53,1.52 | 0.96 | 0.64,1.44 | 0.96 | 0.64,1.44      |
| <b>Age at MS onset</b>   | 397    | 8178 |      |           |      |           |      |           | 1.04 | 1.02,1.06 |      |           |      |                |
| <b>Years with MS †</b>   |        |      |      |           |      |           |      |           |      |           |      |           |      |                |
| <0.5                     | 105    | 754  |      |           |      |           |      |           |      |           | 1.00 |           |      |                |
| >=0.5 to <1              | 46     | 792  |      |           |      |           |      |           |      |           | 0.46 | 0.32,0.65 |      |                |
| >=1 to <2                | 82     | 1585 |      |           |      |           |      |           |      |           | 0.40 | 0.30,0.54 |      |                |
| >=2 to <3                | 60     | 1444 |      |           |      |           |      |           |      |           | 0.31 | 0.22,0.42 |      |                |
| >=3 to <6                | 109    | 3140 |      |           |      |           |      |           |      |           | 0.25 | 0.19,0.33 |      |                |
| >=6                      | 37     | 1333 |      |           |      |           |      |           |      |           | 0.19 | 0.13,0.28 |      |                |
| <b>MS diagnosis year</b> |        |      |      |           |      |           |      |           |      |           |      |           |      |                |
| 2005                     | 37     | 1118 |      |           |      |           |      |           |      |           |      |           |      | 1.00           |
| 2006-2007                | 172    | 3824 |      |           |      |           |      |           |      |           |      |           |      | 1.30 0.91,1.86 |
| 2008-2009                | 138    | 2355 |      |           |      |           |      |           |      |           |      |           |      | 1.72 1.19,2.49 |
| 2010-2011                | 70     | 1405 |      |           |      |           |      |           |      |           |      |           |      | 1.52 1.02,2.29 |
| 2012-2014                | 22     | 346  |      |           |      |           |      |           |      |           |      |           |      | 2.20 1.29,3.77 |

**Abbreviations:** CI=confidence interval; HR=hazard ratio; M=model; RRMS=relapsing remitting MS; PT=person-time; PPMS=primary progressive MS; SPMS; secondary progressive MS.

Individuals with incident MS (N=1790) excluding individuals ever diagnosed with seizures (n=32) and PPMS/SPMS individuals <= 25 years of age at MS diagnosis (n=4).

Adjusted for age and county of residence at MS diagnosis. In models where region of residence violated the proportional hazards assumption, stratified Cox regression models were used. Variable categories with hazard ratios of 1.00 without confidence intervals are reference categories.

\*Model with MS onset includes N=1605 individuals due to missing onset dates.

† Time-varying covariates.

**Supplementary Table 7: Sensitivity analysis among individuals with prevalent MS with no diagnosis of depression or prescription for antidepressants. General variables and their association with spasticity treatment.**

|                            | Events | PT    | M1   |           | M2   |           | M3   |           | M4   |           | M5*  |           | M6   |            | M7   |           |
|----------------------------|--------|-------|------|-----------|------|-----------|------|-----------|------|-----------|------|-----------|------|------------|------|-----------|
|                            |        |       | HR   | 95% CI    | HR   | 95% CI    | HR   | 95% CI    | HR   | 95% CI    | HR   | 95% CI    | HR   | 95% CI     | HR   | 95% CI    |
| <b>Sex</b>                 |        |       |      |           |      |           |      |           |      |           |      |           |      |            |      |           |
| Male                       | 199    | 4045  | 1.00 |           | 1.00 |           | 1.00 |           | 1.00 |           | 1.00 |           | 1.00 |            | 1.00 |           |
| Female                     | 412    | 10030 | 0.82 | 0.69,0.98 | 0.83 | 0.70,0.99 | 0.91 | 0.77,1.09 | 0.92 | 0.78,1.10 | 0.92 | 0.77,1.10 | 0.93 | 0.78,1.11  | 0.92 | 0.77,1.09 |
| <b>Education</b>           |        |       |      |           |      |           |      |           |      |           |      |           |      |            |      |           |
| Compulsory                 | 94     | 1684  |      |           | 1.00 |           | 1.00 |           | 1.00 |           | 1.00 |           | 1.00 |            | 1.00 |           |
| Post-compulsory            | 279    | 6382  |      |           | 0.78 | 0.61,0.99 | 0.85 | 0.67,1.08 | 0.85 | 0.67,1.08 | 0.81 | 0.63,1.05 | 0.85 | 0.67,1.09  | 0.84 | 0.66,1.07 |
| Tertiary                   | 238    | 6009  |      |           | 0.72 | 0.56,0.93 | 0.78 | 0.61,1.01 | 0.78 | 0.61,1.00 | 0.76 | 0.59,0.99 | 0.79 | 0.61,1.01  | 0.78 | 0.61,1.00 |
| <b>Disease course †</b>    |        |       |      |           |      |           |      |           |      |           |      |           |      |            |      |           |
| RRMS                       | 239    | 8575  |      |           |      |           | 1.00 |           | 1.00 |           | 1.00 |           | 1.00 |            | 1.00 |           |
| PPMS                       | 80     | 1029  |      |           |      |           | 3.27 | 2.47,4.33 | 3.20 | 2.42,4.23 | 3.20 | 2.39,4.27 | 3.22 | 2.44,4.27  | 3.25 | 2.45,4.30 |
| SPMS                       | 273    | 4034  |      |           |      |           | 2.76 | 2.27,3.36 | 2.91 | 2.39,3.55 | 2.93 | 2.38,3.62 | 2.92 | 2.39,3.56  | 2.79 | 2.29,3.40 |
| Unknown                    | 19     | 437   |      |           |      |           | 1.78 | 1.11,2.86 | 1.69 | 1.05,2.73 | 1.50 | 0.78,2.86 | 1.68 | 1.04,2.71  | 1.76 | 1.09,2.83 |
| <b>Age at MS diagnosis</b> | 611    | 14075 |      |           |      |           |      |           | 1.02 | 1.01,1.03 |      |           |      |            |      |           |
| <b>Age at MS onset</b>     | 559    | 12768 |      |           |      |           |      |           |      |           | 1.01 | 1.00,1.02 |      |            |      |           |
| <b>Years with MS †</b>     |        |       |      |           |      |           |      |           |      |           |      |           |      |            |      |           |
| 1 to <1.5                  | 1      | 26    |      |           |      |           |      |           |      |           |      |           | 1.00 |            |      |           |
| >=1.5 to <2                | 5      | 74    |      |           |      |           |      |           |      |           |      |           | 1.77 | 0.20,15.63 |      |           |
| >=2 to <2.5                | 9      | 118   |      |           |      |           |      |           |      |           |      |           | 1.98 | 0.24,16.05 |      |           |
| >=2 to <3                  | 12     | 159   |      |           |      |           |      |           |      |           |      |           | 2.11 | 0.27,16.65 |      |           |
| >=3 to <3.5                | 10     | 194   |      |           |      |           |      |           |      |           |      |           | 1.30 | 0.16,10.46 |      |           |
| >=3.5 to 4                 | 12     | 237   |      |           |      |           |      |           |      |           |      |           | 1.12 | 0.14,8.82  |      |           |
| >=4 to <6                  | 64     | 1428  |      |           |      |           |      |           |      |           |      |           | 1.05 | 0.14,7.80  |      |           |
| >=6 to <8                  | 99     | 1960  |      |           |      |           |      |           |      |           |      |           | 1.14 | 0.15,8.37  |      |           |
| >=8 to <10                 | 84     | 2232  |      |           |      |           |      |           |      |           |      |           | 0.80 | 0.11,5.88  |      |           |
| >=10                       | 315    | 7646  |      |           |      |           |      |           |      |           |      |           | 0.78 | 0.11,5.74  |      |           |
| <b>MS diagnosis year</b>   |        |       |      |           |      |           |      |           |      |           |      |           |      |            |      |           |
| 1945-1980                  | 24     | 673   |      |           |      |           |      |           |      |           |      |           |      |            | 0.81 | 0.51,1.26 |
| 1981-1990                  | 68     | 1425  |      |           |      |           |      |           |      |           |      |           |      |            | 0.92 | 0.70,1.23 |
| 1991-2000                  | 252    | 5377  |      |           |      |           |      |           |      |           |      |           |      |            | 1.01 | 0.84,1.20 |
| 2001-2005                  | 267    | 6599  |      |           |      |           |      |           |      |           |      |           |      |            | 1.00 |           |

**Abbreviations:** CI=confidence interval; HR=hazard ratio; M=model; RRMS=relapsing remitting MS; PT=person-time; PPMS=primary progressive MS; SPMS; secondary progressive MS.

Individuals with prevalent MS (N=2040) excluding individuals ever diagnosed with depression or prescribed an antidepressant (n=1479) and PPMS/SPMS individuals diagnosed < age 25 years (n=5). All models adjusted for age and county of residence at MS diagnosis. In models where region of residence violated the proportional hazards assumption, a stratified Cox model was used. Categories with HR of 1.00 and no confidence intervals are reference categories.

\* Due to unknown MS onset dates, model 5 includes 1851/2040 individuals.

† Time varying covariates.

**Supplementary Table 8: Sensitivity analysis among individuals with prevalent MS with no diagnosis of seizures. General variables and their association with spasticity treatment.**

|                             | Events | PT    | M1   |           | M2   |           | M3   |           | M4   |           | M5*  |           | M6   |           | M7   |           |
|-----------------------------|--------|-------|------|-----------|------|-----------|------|-----------|------|-----------|------|-----------|------|-----------|------|-----------|
|                             |        |       | HR   | 95% CI    | HR   | 95% CI    | HR   | 95% CI    | HR   | 95% CI    | HR   | 95% CI    | HR   | 95% CI    | HR   | 95% CI    |
| <b>Sex</b>                  |        |       |      |           |      |           |      |           |      |           |      |           |      |           |      |           |
| Male                        | 317    | 5923  | 1.00 |           | 1.00 |           | 1.00 |           | 1.00 |           | 1.00 |           | 1.00 |           | 1.00 |           |
| Female                      | 814    | 17475 | 0.87 | 0.77,0.99 | 0.89 | 0.78,1.01 | 0.94 | 0.82,1.07 | 0.95 | 0.83,1.08 | 0.96 | 0.84,1.10 | 0.95 | 0.83,1.08 | 0.94 | 0.82,1.07 |
| <b>Education</b>            |        |       |      |           |      |           |      |           |      |           |      |           |      |           |      |           |
| Compulsory                  | 187    | 2831  |      |           | 1.00 |           | 1.00 |           | 1.00 |           | 1.00 |           | 1.00 |           | 1.00 |           |
| Post-compulsory             | 517    | 10821 |      |           | 0.74 | 0.63,0.88 | 0.77 | 0.65,0.91 | 0.77 | 0.65,0.91 | 0.73 | 0.61,0.87 | 0.77 | 0.65,0.92 | 0.76 | 0.64,0.91 |
| Tertiary                    | 427    | 9746  |      |           | 0.70 | 0.59,0.84 | 0.74 | 0.62,0.89 | 0.75 | 0.62,0.89 | 0.72 | 0.60,0.86 | 0.75 | 0.63,0.89 | 0.74 | 0.62,0.89 |
| <b>Disease course †</b>     |        |       |      |           |      |           |      |           |      |           |      |           |      |           |      |           |
| RRMS                        | 480    | 14031 |      |           |      |           | 1.00 |           | 1.00 |           | 1.00 |           | 1.00 |           | 1.00 |           |
| PPMS                        | 121    | 1497  |      |           |      |           | 2.64 | 2.13,3.27 | 2.57 | 2.07,3.19 | 2.56 | 2.05,3.20 | 2.60 | 2.10,3.22 | 2.60 | 2.09,3.22 |
| SPMS                        | 503    | 7158  |      |           |      |           | 2.22 | 1.93,2.55 | 2.31 | 2.01,2.65 | 2.29 | 1.97,2.66 | 2.27 | 1.98,2.62 | 2.24 | 1.94,2.57 |
| Unknown                     | 27     | 712   |      |           |      |           | 1.19 | 0.80,1.75 | 1.14 | 0.77,1.68 | 0.95 | 0.53,1.70 | 1.15 | 0.78,1.70 | 1.17 | 0.79,1.73 |
| <b>Age at MS diagnosis</b>  | 1131   | 23398 |      |           |      |           |      |           | 1.02 | 1.01,1.03 |      |           |      |           |      |           |
| <b>Age at MS onset</b>      | 1034   | 21142 |      |           |      |           |      |           |      |           | 1.01 | 1.00,1.02 |      |           |      |           |
| <b>Years with MS †</b>      |        |       |      |           |      |           |      |           |      |           |      |           |      |           |      |           |
| 1 to <1.5                   | 2      | 42    |      |           |      |           |      |           |      |           |      |           | 1.00 |           |      |           |
| >=1.5 to <2                 | 8      | 117   |      |           |      |           |      |           |      |           |      |           | 1.40 | 0.30,6.65 |      |           |
| >=2 to <2.5                 | 13     | 184   |      |           |      |           |      |           |      |           |      |           | 1.42 | 0.32,6.32 |      |           |
| >=2 to <3                   | 15     | 251   |      |           |      |           |      |           |      |           |      |           | 1.18 | 0.27,5.17 |      |           |
| >=3 to <3.5                 | 18     | 310   |      |           |      |           |      |           |      |           |      |           | 1.13 | 0.26,4.89 |      |           |
| >=3.5 to 4                  | 20     | 379   |      |           |      |           |      |           |      |           |      |           | 0.98 | 0.23,4.22 |      |           |
| >=4 to <6                   | 110    | 2361  |      |           |      |           |      |           |      |           |      |           | 0.87 | 0.21,3.52 |      |           |
| >=6 to <8                   | 160    | 3269  |      |           |      |           |      |           |      |           |      |           | 0.88 | 0.22,3.56 |      |           |
| >=8 to <10                  | 171    | 3691  |      |           |      |           |      |           |      |           |      |           | 0.81 | 0.20,3.28 |      |           |
| >=10                        | 614    | 12794 |      |           |      |           |      |           |      |           |      |           | 0.76 | 0.19,3.04 |      |           |
| <b>Year of MS diagnosis</b> |        |       |      |           |      |           |      |           |      |           |      |           |      |           |      |           |
| 1945-1980                   | 46     | 1053  |      |           |      |           |      |           |      |           |      |           |      |           | 0.81 | 0.59,1.12 |
| 1981-1990                   | 116    | 2348  |      |           |      |           |      |           |      |           |      |           |      |           | 0.88 | 0.71,1.08 |
| 1991-2000                   | 484    | 9050  |      |           |      |           |      |           |      |           |      |           |      |           | 1.07 | 0.94,1.21 |
| 2001-2005                   | 485    | 10947 |      |           |      |           |      |           |      |           |      |           |      |           | 1.00 |           |

**Abbreviations:** CI=confidence interval; HR=hazard ratio; M=model; RRMS=relapsing remitting MS; PT=person-time; PPMS=primary progressive MS; SPMS=secondary progressive MS.

Individuals with prevalent MS (N=3434) excluding individuals ever diagnosed with seizure (n=80) and PPMS/SPMS individuals <= 25 years of age at study entry (n=5). Adjusted for age and county of residence at MS diagnosis. Disease course and years with MS are time-varying covariates. Reference categories indicated by hazard ratios of 1.00 with no confidence interval.

\* Due to unknown MS onset dates, model 5 includes 3109/3434 individuals.

† Time varying covariates.

**Supplementary Table 9: Expanded disability severity scores as fixed and time-varying covariates, disease course and disease modifying therapies and their association with spasticity treatment among individuals with incident MS.**

| Baseline EDSS scores     |        |      |       |            |       |            |       |            |      |            |       |            |       |            |
|--------------------------|--------|------|-------|------------|-------|------------|-------|------------|------|------------|-------|------------|-------|------------|
| EDSS                     | Events | PT   | M1    |            | M2    |            | M3    |            | M4   |            | M5    |            | M6    |            |
|                          |        |      | HR    | 95% CI     | HR    | 95% CI     | HR    | 95% CI     | HR   | 95% CI     | HR    | 95% CI     | HR    | 95% CI     |
| 0                        | 15     | 903  | 1.00  |            | 1.00  |            | 1.00  |            | 1.00 |            | 1.00  |            | 1.00  |            |
| 1-1.5                    | 43     | 1324 | 1.78  | 0.98,3.23  | 1.70  | 0.92,3.14  | 1.62  | 0.87,3.00  | 1.61 | 0.87,2.99  | 1.47  | 0.76,2.83  | 1.47  | 0.76,2.82  |
| 2-2.5                    | 66     | 1107 | 3.23  | 1.83,5.71  | 3.55  | 1.97,6.39  | 3.51  | 1.95,6.31  | 3.37 | 1.88,6.07  | 2.84  | 1.52,5.30  | 2.76  | 1.48,5.16  |
| 3-3.5                    | 39     | 571  | 3.63  | 1.97,6.68  | 3.64  | 1.93,6.84  | 3.48  | 1.85,6.56  | 3.27 | 1.73,6.17  | 2.67  | 1.33,5.37  | 2.63  | 1.31,5.29  |
| 4+                       | 31     | 266  | 6.18  | 3.25,11.75 | 5.39  | 2.75,10.56 | 5.68  | 2.90,11.15 | 4.54 | 2.29,9.03  | 3.98  | 1.83,8.64  | 3.82  | 1.75,8.31  |
| <b>Age at onset</b>      | 405    | 8325 |       |            | 1.05  | 1.02,1.07  | 1.05  | 1.02,1.08  | 1.07 | 1.04,1.10  | 1.03  | 1.00,1.06  | 1.03  | 1.00,1.06  |
| <b>Disease course</b>    |        |      |       |            |       |            |       |            |      |            |       |            |       |            |
| RRMS                     | 312    | 7540 |       |            |       |            |       |            | 1.00 |            | 1.00  |            | 1.00  |            |
| PPMS                     | 57     | 417  |       |            |       |            |       |            | 1.71 | 0.97,3.02  | 1.07  | 0.44,2.56  | 1.11  | 0.46,2.65  |
| SPMS                     | 53     | 569  |       |            |       |            |       |            | 2.88 | 1.77,4.66  | 2.26  | 1.26,4.05  | 2.15  | 1.19,3.87  |
| Unknown                  | 26     | 694  |       |            |       |            |       |            | 0.46 | 0.17,1.27  | 0.61  | 0.19,1.96  | 0.61  | 0.19,1.96  |
| <b>DMT<sup>†</sup></b>   |        |      |       |            |       |            |       |            |      |            |       |            |       |            |
| None                     | 29     | 1144 |       |            |       |            |       |            |      |            | 1.00  |            | 1.00  |            |
| Mod effective            | 266    | 6443 |       |            |       |            |       |            |      |            | 1.59  | 0.88,2.86  | 1.78  | 0.97,3.25  |
| High effective           | 40     | 643  |       |            |       |            |       |            |      |            | 1.90  | 0.94,3.84  | 2.18  | 1.06,4.50  |
| Time varying EDSS scores |        |      |       |            |       |            |       |            |      |            |       |            |       |            |
| EDSS <sup>‡</sup>        | Events | PT   | TVC1  |            | TVC2  |            | TVC3  |            | TVC4 |            | TVC5  |            | TVC6  |            |
|                          |        |      | HR    | 95% CI     | HR    | 95% CI     | HR    | 95% CI     | HR   | 95% CI     | HR    | 95% CI     | HR    | 95% CI     |
| No score                 | 16     | 1076 | 1.00  |            | 1.00  |            | 1.00  |            | 1.00 |            | 1.00  |            | 1.00  |            |
| 0                        | 27     | 1605 | 1.18  | 0.64,2.20  | 1.35  | 0.69,2.63  | 1.37  | 0.70,2.68  | 1.44 | 0.74,2.80  | 2.64  | 1.13,6.17  | 3.24  | 1.37,7.62  |
| 1.0-1.5                  | 56     | 2161 | 1.78  | 1.01,3.12  | 1.85  | 1.01,3.38  | 1.85  | 1.01,3.39  | 1.93 | 1.05,3.53  | 3.20  | 1.43,7.17  | 3.95  | 1.77,8.81  |
| 2.0-2.5                  | 81     | 1641 | 3.23  | 1.87,5.58  | 3.47  | 1.92,6.26  | 3.45  | 1.91,6.22  | 3.48 | 1.93,6.26  | 5.69  | 2.59,12.49 | 7.03  | 3.19,15.50 |
| 3.0-3.5                  | 57     | 922  | 4.04  | 2.27,7.19  | 4.35  | 2.33,8.14  | 4.28  | 2.28,8.02  | 4.27 | 2.28,7.99  | 7.65  | 3.38,17.29 | 9.25  | 4.11,20.82 |
| 4.0-4.5                  | 27     | 306  | 5.92  | 3.13,11.20 | 7.03  | 3.61,13.69 | 6.99  | 3.58,13.64 | 6.44 | 3.28,12.66 | 10.92 | 4.46,26.77 | 13.30 | 5.46,32.38 |
| 5.0-5.5                  | 13     | 123  | 6.80  | 3.16,14.61 | 8.11  | 3.33,19.71 | 7.93  | 3.21,19.60 | 6.92 | 2.78,17.25 | 11.79 | 4.02,34.61 | 15.96 | 5.70,44.66 |
| 6.0-8.5                  | 45     | 259  | 11.31 | 6.15,20.79 | 11.20 | 5.72,21.94 | 11.00 | 5.61,21.59 | 9.84 | 5.00,19.35 | 14.14 | 5.44,36.76 | 18.63 | 7.23,48.00 |
| <b>Age at onset</b>      | 302    | 7528 |       |            | 1.04  | 1.02,1.07  | 1.04  | 1.02,1.07  | 1.05 | 1.03,1.07  | 1.04  | 1.02,1.07  | 1.02  | 1.00,1.05  |
| <b>Disease course</b>    |        |      |       |            |       |            |       |            |      |            |       |            |       |            |
| RRMS                     | 235    | 6802 |       |            |       |            |       |            | 1.00 |            | 1.00  |            | 1.00  |            |
| PPMS                     | 38     | 358  |       |            |       |            |       |            | 1.45 | 0.90,2.33  | 1.10  | 0.56,2.15  | 1.19  | 0.62,2.25  |
| SPMS                     | 40     | 541  |       |            |       |            |       |            | 1.81 | 1.22,2.70  | 1.46  | 0.93,2.29  | 1.35  | 0.87,2.11  |
| Unknown                  | 9      | 391  |       |            |       |            |       |            | 0.59 | 0.27,1.27  | 0.59  | 0.25,1.44  | 0.59  | 0.24,1.45  |
| <b>DMT<sup>†</sup></b>   |        |      |       |            |       |            |       |            |      |            |       |            |       |            |
| None                     | 27     | 1055 |       |            |       |            |       |            |      |            | 1.00  |            | 1.00  |            |
| Mod effective            | 199    | 5796 |       |            |       |            |       |            |      |            | 1.22  | 0.76,1.97  | 1.47  | 0.92,2.35  |
| High effective           | 34     | 599  |       |            |       |            |       |            |      |            | 1.55  | 0.85,2.85  | 1.91  | 1.04,3.51  |

**Abbreviations:** CI=confidence interval; High=highly; HR=hazard ratio; M=model; Mod=moderately; RRMS=relapsing remitting MS; PT=person-time; PPMS=primary progressive MS; SPMS; secondary progressive MS; TVC=time-varying covariate.

Individuals with incident MS. Model 1 adjusted for age, county of residence at MS diagnosis, and highest attained education. Model 2 additionally adjusted for number of years from MS onset to diagnosis and calendar year of MS diagnosis. Model 3 additionally adjusted for vascular disease and depression. Model 6 additionally adjusted for time with MS as an additional timescale. Note, due to missing values, the number of individuals in each model vary. Baseline EDSS: Model 1 N=811, Models 2-4 N=764, Models 5-6 N=670. Time-varying EDSS: TVC 1 N=1510, TVC 2-4 N=1398, and TVC 5-6 N=1258. More individuals were included in the TVC EDSS models as not all had baseline EDSS scores, but were assessed for their EDSS scores after baseline. <sup>†</sup> Time-varying covariates.
