# Supplementary material
Source: HighWire-hosted journal article supplement (https://jnnp.bmj.com/content/94/5/337)
Supplement: inline-supplementary-material-8 [file inline-supplementary-material-8.pdf]

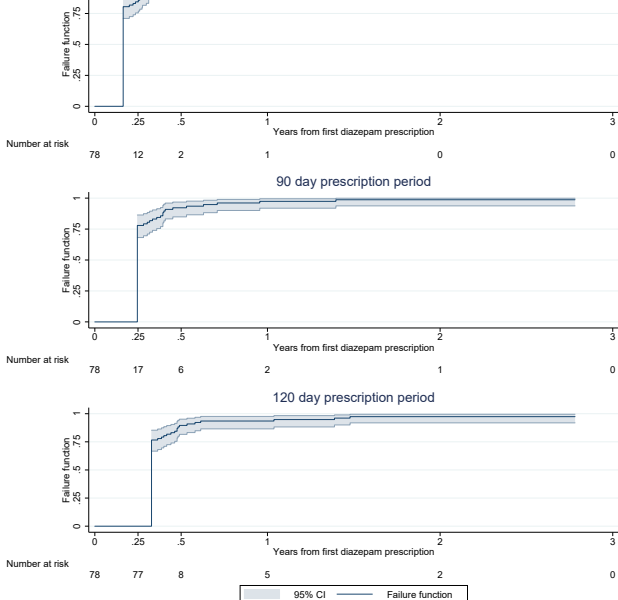

Supplementary Figure 4: Time to discontinuation of diazepam among people with incident multiple sclerosis who had diazepam as their first drug to treat possible spasticity.
