# Supplementary material
Source: HighWire-hosted journal article supplement (https://jnnp.bmj.com/content/94/5/337)
Supplement: inline-supplementary-material-9 [file inline-supplementary-material-9.pdf]

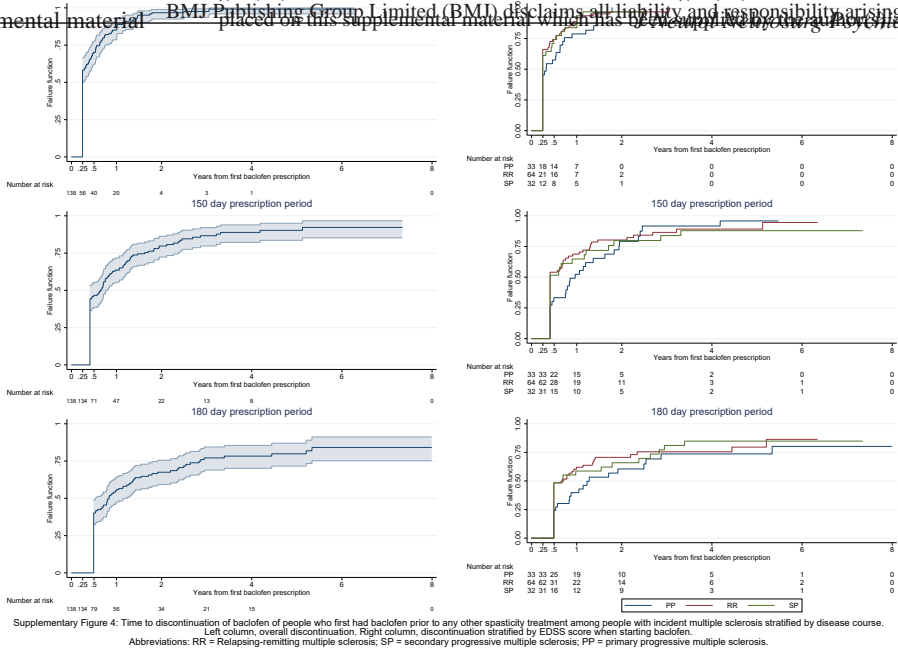

Supplementary Figure 4: Time to discontinuation of baclofen of people who first had baclofen prior to any other spasticity treatment among people with incident multiple sclerosis stratified by disease course.

Left column, overall discontinuation. Right column, discontinuation stratified by EDSS score when starting baclofen.

Abbreviations: RR = Relapsing-remitting multiple sclerosis; SP = secondary progressive multiple sclerosis; PP = primary progressive multiple sclerosis.
